# Supplementary material for: Coexistence of intrinsic room-temperature ferromagnetism and piezoelectricity in monolayer BiCrX3 (X = S, Se, and Te)
Source: Royal Society of Chemistry journal article supplement (doi:10.1039/d1cp04900c), 2021-12-03
Supplement: d1cp04900c1.pdf [file d1cp04900c1.pdf]

# Supplementary information “Coexistence of intrinsic room-temperature ferromagnetism and piezoelectricity in monolayer BiCrX<sub>3</sub> (X = S, Se, and Te)”

Guang Song,<sup>a,\*</sup> Chengfeng Zhang,<sup>a</sup> Zhengzhong Zhang,<sup>a</sup> Guannan Li,<sup>a</sup> Zhongwen Li,<sup>a</sup> Juan Du,<sup>a,\*</sup> Bingwen Zhang,<sup>b</sup> Xiaokun Huang,<sup>c</sup> and Benling Gao<sup>a</sup>

<sup>a</sup>Department of Physics, Huaiyin Institute of Technology, Huaian 223003, China

<sup>b</sup>Fujian Key Laboratory of Functional Marine Sensing Materials, Minjiang University, Fuzhou 350108, China

<sup>c</sup>School of Materials Science and Engineering, Jingdezhen Ceramic Institute, Jingdezhen 333001, China

\* Corresponding author: Guang Song, [gsong@hyit.edu.cn](mailto:gsong@hyit.edu.cn); Ju Du, [dujuan@hyit.edu.cn](mailto:dujuan@hyit.edu.cn)

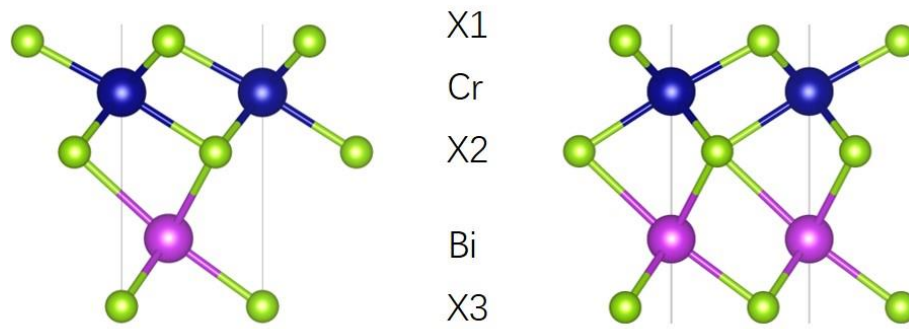

**Figure S1.** The number labels for X atoms in the ABCAB (left) and ABCBA (right) configurations.

Magenta, blue, green represent Bi, Cr, and X (X = S, Se, and Te) atoms, respectively.

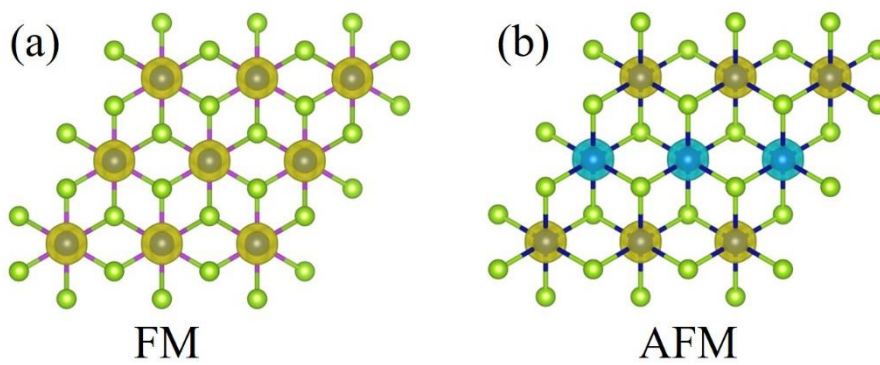

**Figure S2.** (a) FM, (b) AFM configurations. Magenta, blue, green represent Bi, Cr, and X (X = S, Se, and Te) atoms, respectively.

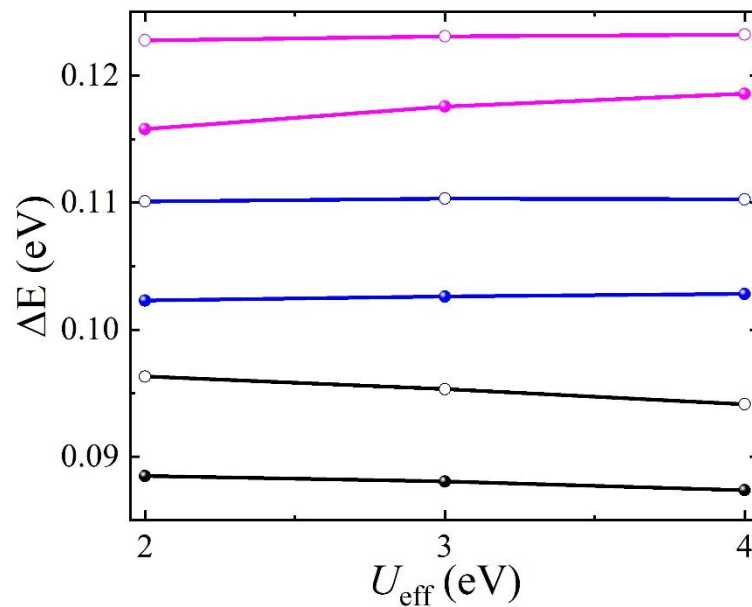

**Figure S3.** The calculated energy difference of BiCrX<sub>3</sub> monolayers as a function of  $U_{\text{eff}}$ . The black, blue, and magenta lines represent the BiCrS<sub>3</sub>, BiCrSe<sub>3</sub>, and BiCrTe<sub>3</sub>, respectively. The solid and hollow points represent the ABCAB and ABCBA configurations, respectively.

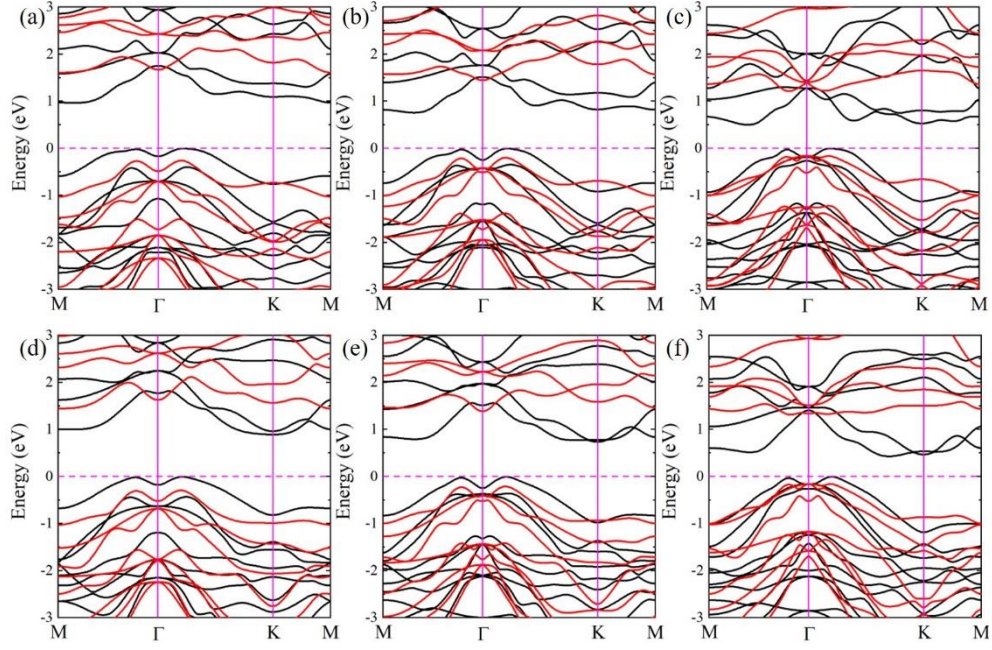

**Figure S4.** The calculated band-structure of  $\text{BiCrX}_3$  monolayers with FM magnetic configuration. (a), (b), and (c) are the  $\text{BiCrS}_3$ ,  $\text{BiCrSe}_3$ , and  $\text{BiCrTe}_3$  with ABCAB configuration. (d), (e), and (f) are the  $\text{BiCrS}_3$ ,  $\text{BiCrSe}_3$ , and  $\text{BiCrTe}_3$  with ABCAB configuration. The carmine dashed lines represent the Fermi level set at 0 eV.

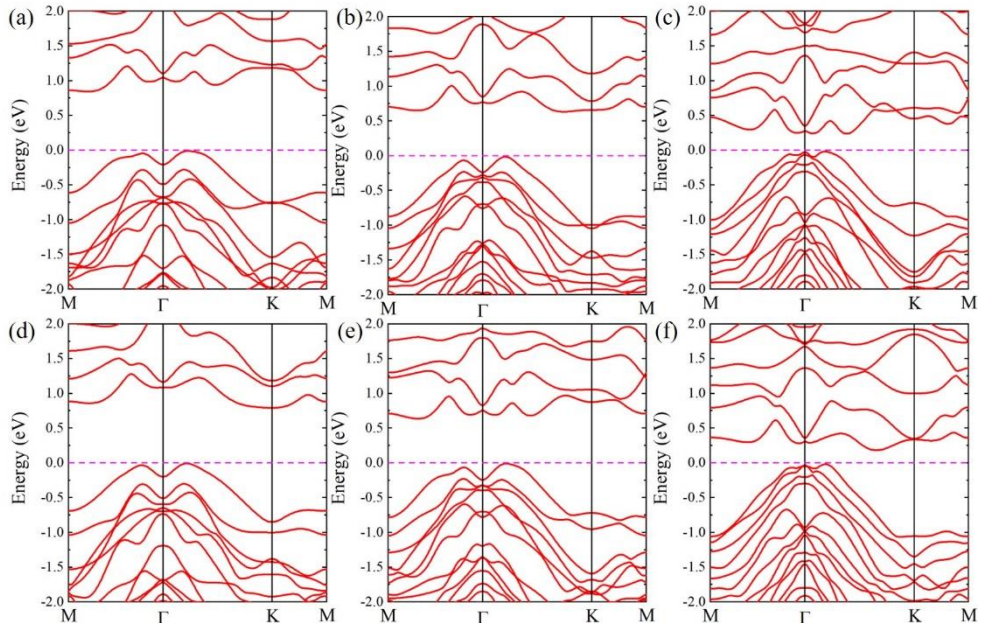

**Figure S5.** The calculated band-structure of  $\text{BiCrX}_3$  monolayers with FM magnetic configuration including spin-orbital coupling effect. (a), (b), and (c) are the  $\text{BiCrS}_3$ ,  $\text{BiCrSe}_3$ , and  $\text{BiCrTe}_3$  with ABCAB configuration. (d), (e), and (f) are the  $\text{BiCrS}_3$ ,  $\text{BiCrSe}_3$ , and  $\text{BiCrTe}_3$  with ABCAB configuration. The carmine dashed lines represent the Fermi level set at 0 eV.

**Table S1.** The detailed structural information of BiCrX<sub>3</sub> monolayers. Cr-X1 and Cr-X2 are the bond lengths, which are in the unit of Å. Cr-X1-Cr and Cr-X2-Cr are the bond angles, which are in the unit of °. The X1 and X2 represent S, Se, and Te atoms, labeled in the Figure S2.

| Materials           | Configuration | Cr-X1 | Cr-X2 | Cr-X1-Cr | Cr-X2-Cr |
|---------------------|---------------|-------|-------|----------|----------|
| BiCrS <sub>3</sub>  | ABCAB         | 2.464 | 2.592 | 100.48   | 93.86    |
|                     | ABCBA         | 2.452 | 2.595 | 100.17   | 92.91    |
| BiCrSe <sub>3</sub> | ABCAB         | 2.603 | 2.708 | 98.97    | 93.91    |
|                     | ABCBA         | 2.592 | 2.709 | 98.75    | 93.13    |
| BiCrTe <sub>3</sub> | ABCAB         | 2.818 | 2.894 | 97.62    | 94.22    |
|                     | ABCBA         | 2.808 | 2.891 | 97.40    | 93.80    |

**Table S2.** The calculated total energies of BiCrX<sub>3</sub> monolayers with the magnetization along different directions, the MAE, and the single site magnetic anisotropy parameter. The energies of 001, 100, and 100 are in the unit of eV. The energies of MAE and the single site magnetic anisotropy parameter D are in the unit of meV.

| Materials           | Configuration | 001        | 100        | 100        | MAE   | D     |
|---------------------|---------------|------------|------------|------------|-------|-------|
| BiCrS <sub>3</sub>  | ABCAB         | -26.399026 | -26.398874 | -26.398874 | 0.152 | 0.068 |
|                     | ABCBA         | -26.352365 | -26.352186 | -26.352186 | 0.179 | 0.080 |
| BiCrSe <sub>3</sub> | ABCAB         | -24.524023 | -24.523873 | -24.523873 | 0.15  | 0.066 |
|                     | ABCBA         | -24.507651 | -24.507487 | -24.507487 | 0.164 | 0.073 |
| BiCrTe <sub>3</sub> | ABCAB         | -22.644541 | -22.644012 | -22.644012 | 0.529 | 0.235 |
|                     | ABCBA         | -22.653195 | -22.652573 | -22.652573 | 0.622 | 0.276 |
